# Supplementary material for: Phosphoinositide 3-Kinase (PI3K) Subunit p110δ Is Essential for Trophoblast Cell Differentiation and Placental Development in Mouse
Source: PubMed Central journal article supplement (PMC4910077; doi:10.1038/srep28201), 2016-06-16
Supplement: srep28201-s1.pdf [file srep28201-s1.pdf]

## **Phosphoinositide 3-Kinase (PI3K) Subunit p110 $\delta$ Is Essential for Trophoblast Cell Differentiation and Placental Development in Mouse**

Xiwen Hu<sup>1\*</sup>, Jiangchao Li<sup>1\*</sup>, Qianqian Zhang<sup>1</sup>, Lingyun Zheng<sup>2</sup>, Guang Wang<sup>3</sup>, Xiaohan Zhang<sup>1</sup>, Jingli Zhang<sup>1</sup>, Quliang Gu<sup>1</sup>, Yuxiang Ye<sup>1</sup>, Sun-Wei Guo<sup>4</sup>, Xuesong Yang<sup>3#</sup> & Lijing Wang<sup>1#</sup>

<sup>1</sup>Vascular Biology Research Institute, Guangdong Pharmaceutical University, Guangzhou 510006, China; <sup>2</sup>School of Basic Courses, Guangdong Pharmaceutical University, Guangzhou, 510006, Guangdong, China; <sup>3</sup>Key Laboratory for Regenerative Medicine of the Ministry of Education, Division of Histology & Embryology, Medical College, Jinan University, Guangzhou 510632, China. <sup>4</sup>Shanghai OB/GYN Hospital, Fudan University, Shanghai 200011, China; and Shanghai Key Laboratory of Female Reproductive Endocrine-Related Diseases, Fudan University, Shanghai, China

\* These two authors contributed equally to this work.

#Corresponding authors: LJ Wang, Ph.D., E-mail: [wanglijing62@163.com](mailto:wanglijing62@163.com) or X Yang, Ph.D., E-mail: [yang\\_xuesong@126.com](mailto:yang_xuesong@126.com)

Conflict-of-interest disclosure: The authors declare no conflicting financial interests.

## Supplementary Figure S1

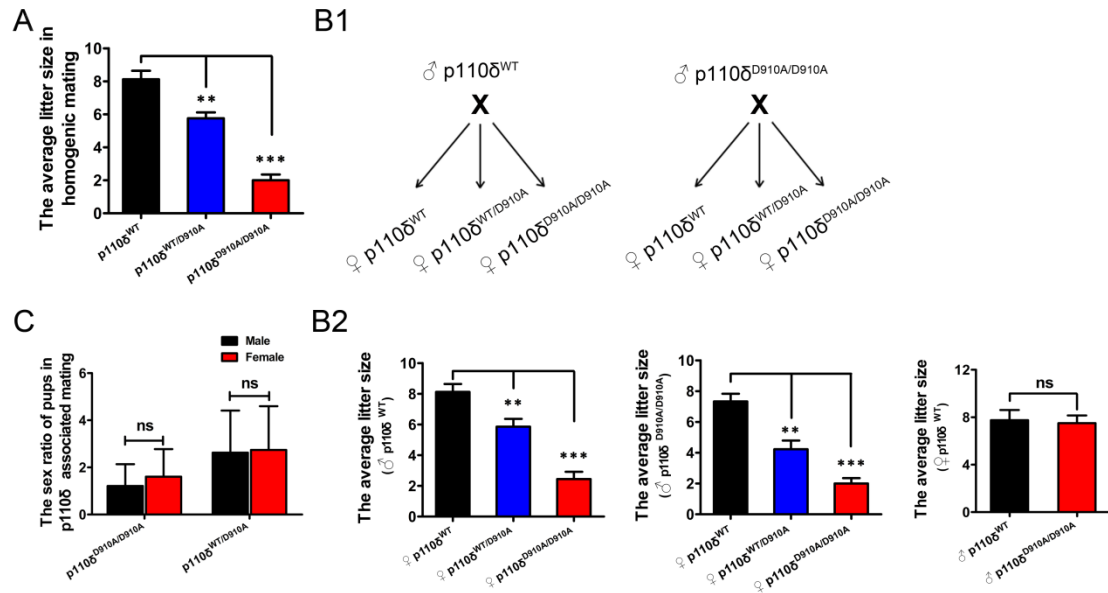

### The statistical analyses of mice mating.

**A.** The statistical results of average litter size in three different homogenic mice mating. **B1-B2.** The detailed genotyping breeding studies in inactive p110δ mice. **C.** The sex ratio of pups in inactive p110δ mice mating.

## Supplementary Figure S2

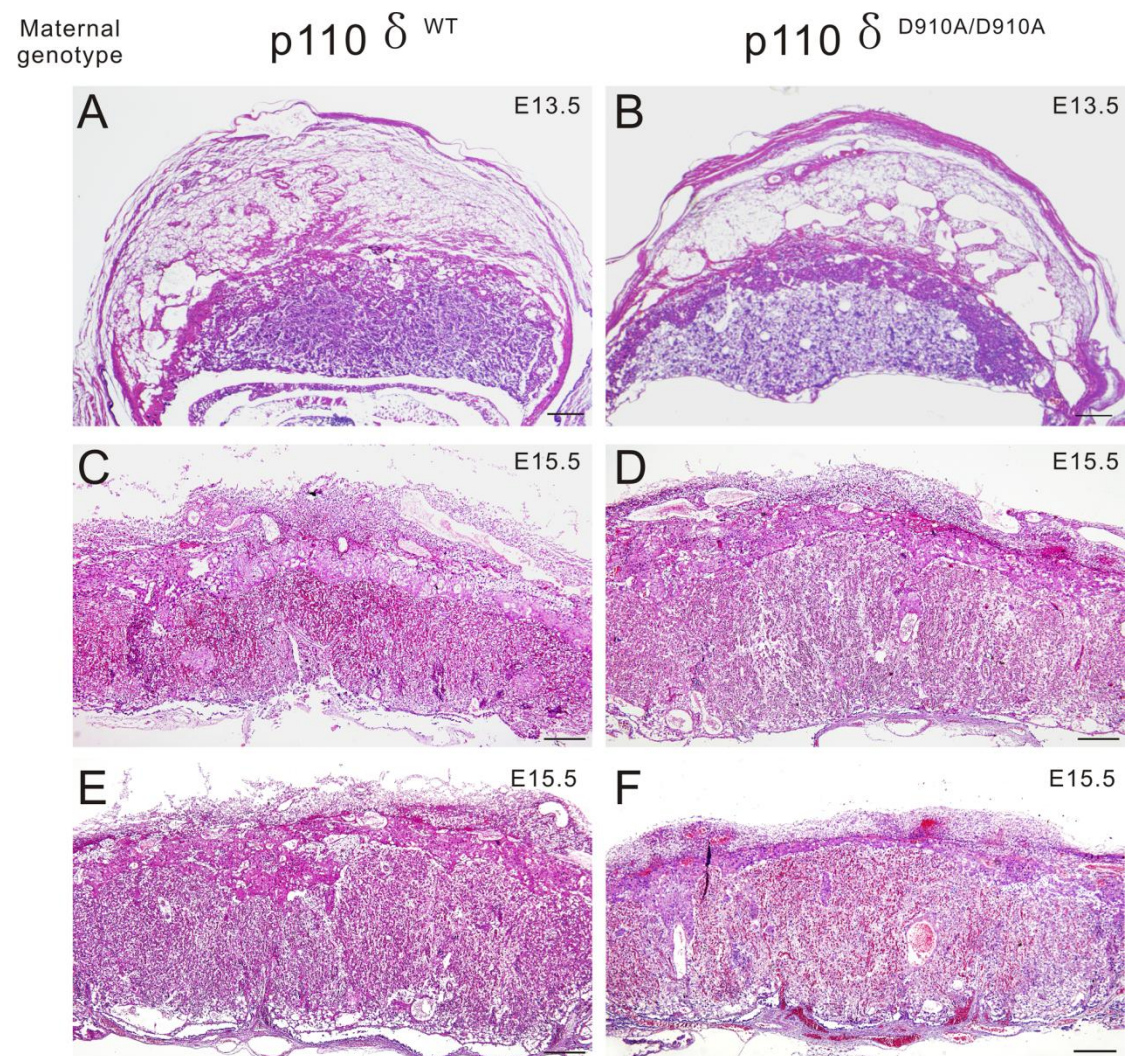

### The additional histological observation of the placenta.

The H&E staining of placenta cross-sections at E13.5 (A-B) and at E15.5 (C-F) from  $p110\delta^{WT}$  and  $p110\delta^{D910A/D910A}$  female mice, respectively. Scale bars: 500 $\mu$ m

### Supplementary Figure S3

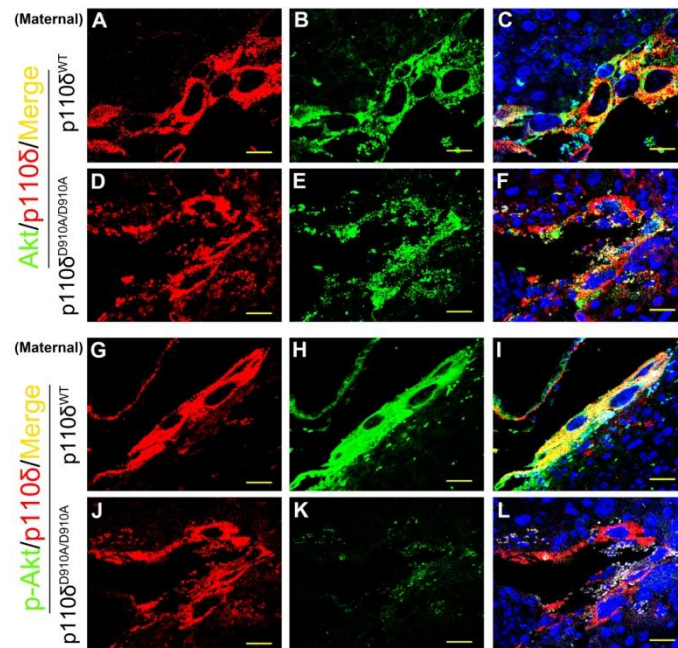

#### The activation of the PI3K/Akt signal in P-TGCs.

**A-F.** Dual immunofluorescent test against Akt and p110 $\delta$  at E8.5 P-TGCs from p110 $\delta$ <sup>WT</sup> and p110 $\delta$ <sup>D910A/D910A</sup> female mice. **G-L.** Dual immunofluorescent test against p-Akt and p110 $\delta$  at E8.5 P-TGCs from p110 $\delta$ <sup>WT</sup> and p110 $\delta$ <sup>D910A/D910A</sup> female mice.

Scale bars: 25 $\mu$ m

## Supplementary Figure S4

| Name           | Primer Sequences         |                          |
|----------------|--------------------------|--------------------------|
|                | F (5'-3')                | R (5'-3')                |
| Hand1          | CATCGCCTACTTGATGGACGTG   | CCCTTTAATCCTCTCTCGCCG    |
| Mash2          | GTGCAAACGTCCACTTCCCACC   | TGCTTTCCTCCGACGAGTAGGC   |
| HIF-1 $\alpha$ | GTCGGACAGCCTACCAAACAGAGC | GTTAACCTGATCCAAAGCTCTGAG |
| Gcm 1          | GATACTGAGCTGGGACATTAACG  | CTGTCGTCCGAGCTGTAGATG    |
| PLF            | AGCCCATGAGATGCAATACT     | CGGACTGCGTTGATCTTTTTCTT  |
| PL1            | CCACTGAAGACCTGTATACTC    | GGACTGCAGTCTTCGAGTC      |
| PL2            | CACCAGACAACATCGGAAGAC    | TGACAGCAGAGTATCAGGTACA   |
| FGFR2          | AGCGCCTGTGAGAGAGAAG      | CCGAAACTGTTACCTGTCTCC    |
| LIFR           | AGCTCTGACCCTCCTGCAT      | TGGGTGACAAGAATGGAACCT    |
| SOCS3          | TCACACTGAGCGTCGAGA       | GTGGAGCATCATACTGGT       |
| CCN1           | CTCCAGAATCTACCAAACGGG    | CGTCCAGGGAGTCCTTAATGC    |
| VEGFR1         | CTCAGGGTCGAAGTAAAAGTGC   | TTGCCTGTTATCCCTCCCACA    |
| VEGF           | ATGACTTTCTGCTGTCTTGGGTG  | CACCGCCTCGGCTTGCACA      |
| MMP12          | TGAAGCGTGAGGATGTAGACT    | TCAAGGATGGGGGTTTCACT     |
| GATA3          | GGAGGACTTCCCCAAGAGCA     | CATGCTGGAAGGGTGGTGAG     |
| GAPDH          | TCCACCACCTGTTGCTGTA      | TCCACCACCTGTTGCTGTA      |

**The list of detail primer sequences used in RT-PCR experiment.**
